# Supplementary material for: Mechanism of persister formation in response to nitrogen starvation
Source: Research Square preprint supplement (doi:10.21203/rs.3.rs-7237366/v1), 2025-08-13
Supplement: Supplementary file 1 [file 7e8d67f3ed6da407c1d61e44.xlsx]

## Sheet: Sheet1
Locustag	Gene	Description	FeatureType	logFC	PValue	Benjamini_Hochberg_Adjusted_PValue
b2659	glaH	glutarate dioxygenase GlaH	CDS	9.17455	4.09203e-07	4.48756e-05
b1007	rutF	FMN reductase RutF	CDS	8.1845	0.00017645	0.000779796
b2660	lhgD	L-2-hydroxyglutarate dehydrogenase	CDS	8.1459	1.63826e-06	5.77351e-05
b1006	rutG	pyrimidine:H(+) symporter	CDS	7.87071	4.11979e-07	4.48756e-05
b1011	rutB	ureidoacrylate amidohydrolase	CDS	7.84024	0.00699721	0.0136945
b1744	astE	succinylglutamate desuccinylase	CDS	7.80593	1.78816e-07	4.3847e-05
b2663	gabP	4-aminobutanoate:H(+) symporter	CDS	7.77503	1.17045e-06	5.47695e-05
b1008	rutE	putative malonic semialdehyde reductase	CDS	7.74365	0.00169855	0.00432316
b2661	gabD	succinate-semialdehyde dehydrogenase (NADP(+)) GabD	CDS	7.5492	5.34114e-06	9.61179e-05
b1012	rutA	pyrimidine monooxygenase RutA	CDS	7.51365	0.0184296	0.0309248
b1010	rutC	3-aminoacrylate deaminase	CDS	7.4458	0.0174685	0.0296755
b2662	gabT	4-aminobutyrate aminotransferase GabT	CDS	7.43838	1.66745e-06	5.77351e-05
b1009	rutD	putative aminoacrylate hydrolase RutD	CDS	7.32246	0.00490095	0.0101484
b4002	zraP	signaling pathway modulator ZraP	CDS	6.64645	1.32135e-06	5.55906e-05
b1745	astB	N-succinylarginine dihydrolase	CDS	6.54902	3.48796e-06	7.50863e-05
b1440	ydcS	putative ABC transporter periplasmic binding protein/polyhydroxybutyrate synthase	CDS	6.46261	1.72637e-06	5.77351e-05
b4107	yjdN	PF06983 family protein YjdN	CDS	6.01153	3.49286e-07	4.44829e-05
b1259	yciG	stress-induced bacterial acidophilic repeat motifs-containing protein YciG	CDS	6.00881	1.78194e-06	5.77351e-05
b1195	ymgE	PF04226 family protein YmgE	CDS	5.97794	2.71239e-06	6.65869e-05
b3073	patA	putrescine aminotransferase	CDS	5.95762	0.00222067	0.00534951
b1748	astC	succinylornithine transaminase	CDS	5.83664	0.00769437	0.0148671
b2135	yohC	putative inner membrane protein	CDS	5.77432	6.06714e-07	4.90866e-05
b4755	yqhI	protein YqhI	CDS	5.72378	2.28873e-06	6.39789e-05
b2080	yegP	DUF1508 domain-containing protein YegP	CDS	5.71045	3.55234e-07	4.44829e-05
b1487	ddpA	putative D,D-dipeptide ABC transporter periplasmic binding protein	CDS	5.54822	0.011032	0.0201387
b1454	yncG	putative glutathione S-transferase YncG	CDS	5.53324	1.3887e-07	4.3847e-05
b0331	prpB	2-methylisocitrate lyase	CDS	5.52851	6.25789e-05	0.00038351
b1746	astD	aldehyde dehydrogenase	CDS	5.47862	0.00526052	0.0107721
b0753	ybgS	PF13985 family protein YbgS	CDS	5.37309	3.83716e-06	8.01343e-05
b3597	yibH	inner membrane protein YibH	CDS	5.26057	1.82378e-07	4.3847e-05
b0806	mcbA	DUF1471 domain-containing protein McbA	CDS	5.14681	4.18306e-06	8.30161e-05
b1747	astA	arginine N-succinyltransferase	CDS	5.14579	0.0143641	0.0251565
b1596	ynfM	putative transporter YnfM	CDS	5.10066	1.8524e-06	5.78468e-05
b1218	chaC	glutathione-specific gamma-glutamylcyclotransferase	CDS	5.08922	3.33146e-06	7.47682e-05
b2664	glaR	DNA-binding transcriptional repressor GlaR	CDS	5.08358	1.83961e-06	5.78468e-05
b1486	ddpB	putative D,D-dipeptide ABC transporter membrane subunit DdpB	CDS	5.07673	0.00176669	0.00445143
b3494	uspB	universal stress protein B	CDS	5.06294	7.12846e-07	5.13722e-05
b2371	yfdE	acetyl-CoA:oxalate CoA-transferase	CDS	5.0243	5.49644e-07	4.76396e-05
b2137	yohF	putative oxidoreductase YohF	CDS	5.0173	6.08547e-07	4.90866e-05
b1537	ydeJ	PF02464 family protein YdeJ	CDS	4.98235	1.08565e-06	5.47695e-05
b1536	ydeI	BOF family protein YdeI	CDS	4.96962	7.36145e-06	0.000106084
b2535	csiE	stationary phase-inducible protein CsiE	CDS	4.9579	1.13995e-05	0.000138964
b2875	yqeB	XdhC-CoxI family protein YqeB	CDS	4.93961	4.93824e-07	4.48756e-05
b2464	talA	transaldolase A	CDS	4.8856	8.07214e-06	0.000111669
b3598	yibI	DUF3302 domain-containing protein YibI	CDS	4.78072	1.60819e-06	5.77351e-05
b1488	ddpX	D-alanyl-D-alanine dipeptidase	CDS	4.77252	0.0652272	0.0928974
b1988	nac	DNA-binding transcriptional dual regulator Nac	CDS	4.76678	0.00698212	0.0136776
b2465	tktB	transketolase 2	CDS	4.7321	4.27071e-06	8.35839e-05
b3548	yhjY	putative outer membrane protein YhjY	CDS	4.70544	2.60092e-06	6.52606e-05
b3361	fic	putative adenosine monophosphate--protein transferase Fic	CDS	4.68984	6.38411e-07	4.90866e-05
b1563	relE	mRNA interferase toxin RelE	CDS	4.67539	2.84198e-06	6.84813e-05
b1188	ycgB	PF04293 family protein YcgB	CDS	4.6614	1.18696e-06	5.47695e-05
b4737	ymdG	protein YmdG	CDS	4.65852	4.40886e-06	8.49819e-05
b2876	yqeC	uncharacterized protein YqeC	CDS	4.65443	3.56115e-07	4.44829e-05
b3239	yhcO	putative barnase inhibitor	CDS	4.61671	3.27949e-07	4.44829e-05
b1953	yodD	stress-induced protein	CDS	4.58705	9.09862e-07	5.47695e-05
b0964	yccT	DUF2057 domain-containing protein YccT	CDS	4.57941	9.58909e-07	5.47695e-05
b1784	yeaH	DUF444 domain-containing protein YeaH	CDS	4.56469	0.000703784	0.00217222
b2637	yfjT	uncharacterized protein YfjT	CDS	4.54478	0.0262082	0.042034
b1196	ycgY	uncharacterized protein YcgY	CDS	4.53366	4.79039e-06	8.96247e-05
b0333	prpC	2-methylcitrate synthase	CDS	4.51928	7.20618e-06	0.000105533
b1836	yebV	DUF1480 domain-containing protein YebV	CDS	4.47474	1.67956e-06	5.77351e-05
b2889	idi	isopentenyl-diphosphate Delta-isomerase	CDS	4.41786	0.00136055	0.00360466
b1955	yedP	putative mannosyl-3-phosphoglycerate phosphatase	CDS	4.41278	1.29977e-06	5.55906e-05
b4310	nanM	N-acetylneuraminate mutarotase	CDS	4.38965	4.77183e-07	4.48756e-05
b1987	cbl	DNA-binding transcriptional activator Cbl	CDS	4.38552	0.0124817	0.0223199
b1469	narU	nitrate/nitrite transporter NarU	CDS	4.38218	3.07042e-06	7.12572e-05
b4199	yjfY	DUF1471 domain-containing protein YjfY	CDS	4.34323	9.09506e-07	5.47695e-05
b3049	glgS	surface composition regulator	CDS	4.32858	0.0423653	0.0636679
b2302	yfcG	disulfide bond oxidoreductase YfcG	CDS	4.31285	1.51516e-06	5.74543e-05
b0871	poxB	pyruvate oxidase	CDS	4.31223	1.21605e-06	5.47695e-05
b1564	relB	antitoxin/DNA-binding transcriptional repressor RelB	CDS	4.30409	6.50828e-06	0.000100656
b2672	ygaM	DUF883 domain-containing protein YgaM	CDS	4.29685	8.11591e-07	5.47115e-05
b1896	otsA	trehalose-6-phosphate synthase	CDS	4.27515	3.93768e-06	8.0789e-05
b3421	rtcB	RNA-splicing ligase	CDS	4.24311	1.65727e-06	5.77351e-05
b1428	ydcK	putative acyltransferase YdcK	CDS	4.22162	1.00773e-06	5.47695e-05
b1668	ydhS	FAD/NAD(P) binding domain-containing protein YdhS	CDS	4.20608	1.34058e-06	5.55906e-05
b0384	psiF	phosphate starvation-inducible protein PsiF	CDS	4.19797	1.62051e-06	5.77351e-05
b2131	osmF	glycine betaine ABC transporter periplasmic binding protein OsmF	CDS	4.18633	6.34204e-07	4.90866e-05
b4746	yddY	protein YddY	CDS	4.18289	2.05159e-06	5.96458e-05
b4187	aidB	putative acyl-CoA dehydrogenase AidB	CDS	4.15276	7.37863e-07	5.13722e-05
b1783	yeaG	protein kinase YeaG	CDS	4.07594	0.00014011	0.000665899
b4679	yohP	putative membrane protein YohP	CDS	4.07289	3.30775e-06	7.47682e-05
b4757	ysdD	protein YsdD	CDS	4.04092	1.21759e-05	0.000144445
b1051	msyB	acidic protein MsyB	CDS	4.03892	4.57067e-07	4.48756e-05
b2127	mlrA	DNA-binding transcriptional activator MlrA	CDS	3.99804	7.27528e-07	5.13722e-05
b1490	dosC	diguanylate cyclase DosC	CDS	3.98847	7.40208e-06	0.000106084
b3448	yhhA	DUF2756 domain-containing protein YhhA	CDS	3.97507	1.78448e-06	5.77351e-05
b3519	treF	cytoplasmic trehalase	CDS	3.96799	3.06598e-06	7.12572e-05
b2347	yfdC	inner membrane protein YfdC	CDS	3.94254	6.50139e-06	0.000100656
b1897	otsB	trehalose-6-phosphate phosphatase	CDS	3.94054	1.28545e-06	5.55906e-05
b2602	yfiL	DUF2799 domain-containing lipoprotein YfiL	CDS	3.92369	2.45786e-06	6.52606e-05
b0456	ybaA	DUF1428 domain-containing protein YbaA	CDS	3.91937	5.04583e-06	9.21999e-05
b0803	ybiI	zinc finger domain-containing protein YbiI	CDS	3.90963	1.03535e-06	5.47695e-05
b0875	aqpZ	water channel AqpZ	CDS	3.87719	1.1734e-06	5.47695e-05
b1678	ldtE	L,D-transpeptidase LdtE	CDS	3.8749	5.18691e-06	9.41403e-05
b3362	yhfG	DUF2559 domain-containing protein YhfG	CDS	3.8668	2.87961e-06	6.84813e-05
b1971	msrP	protein-L-methionine sulfoxide reductase catalytic subunit MsrP	CDS	3.83264	1.44753e-06	5.64403e-05
b1217	chaB	putative cation transport regulator ChaB	CDS	3.81434	6.68786e-07	4.98304e-05
b0507	gcl	glyoxylate carboligase	CDS	3.81346	1.15236e-06	5.47695e-05
b1462	yddH	flavin reductase-like protein YddH	CDS	3.76603	1.13857e-06	5.47695e-05
b1837	yebW	DUF1482 domain-containing protein YebW	CDS	3.7654	1.03057e-06	5.47695e-05
b3102	yqjG	glutathionyl-hydroquinone reductase YqjG	CDS	3.72796	2.55341e-06	6.52606e-05
b1450	mcbR	DNA-binding transcriptional dual regulator McbR	CDS	3.72252	2.48323e-06	6.52606e-05
b2665	kbp	K(+) binding protein	CDS	3.6865	1.91783e-06	5.84194e-05
b1963	drpB	cell division protein DrpB	CDS	3.68153	1.49514e-06	5.73891e-05
b1003	yccJ	PF13993 family protein YccJ	CDS	3.67015	1.84957e-06	5.78468e-05
b0980	appA	periplasmic phosphoanhydride phosphatase/multiple inositol-polyphosphate phosphatase	CDS	3.65071	1.43511e-06	5.64403e-05
b4554	yibT	protein YibT	CDS	3.59562	2.00308e-05	0.000190223
b2266	elaB	tail-anchored inner membrane protein ElaB	CDS	3.58445	3.22385e-06	7.36112e-05
b4544	arnE	undecaprenyl-phosphate-alpha-L-Ara4N flippase - ArnE subunit	CDS	3.56399	0.000130687	0.00063577
b1646	sodC	superoxide dismutase (Cu-Zn)	CDS	3.56213	1.22512e-06	5.47695e-05
b3555	yiaG	putative DNA-binding transcriptional regulator YiaG	CDS	3.55115	1.35658e-05	0.000151616
b1020	phoH	ATP-binding protein PhoH	CDS	3.54808	4.70075e-05	0.000326211
b1797	yeaR	DUF1971 domain-containing protein YeaR	CDS	3.52333	1.83197e-05	0.000180101
b0283	paoD	molybdenum cofactor insertion chaperone PaoD	CDS	3.49355	4.77121e-05	0.000326437
b2647	ypjA	adhesin-like autotransporter YpjA	CDS	3.45057	1.74283e-06	5.77351e-05
b1931	yedK	genome maintenance protein	CDS	3.41945	4.21282e-06	8.32179e-05
b2086	yegS	lipid kinase YegS	CDS	3.37791	5.52602e-05	0.000357331
b1521	uxaB	tagaturonate reductase	CDS	3.3526	0.0146392	0.0255225
b0284	paoC	aldehyde dehydrogenase: molybdenum cofactor-binding subunit	CDS	3.34697	1.30415e-05	0.000148891
b0285	paoB	aldehyde dehydrogenase, FAD-binding subunit	CDS	3.34586	4.88336e-06	9.03537e-05
b0451	amtB	ammonium transporter	CDS	3.33196	0.0207405	0.0341547
b0435	bolA	DNA-binding transcriptional dual regulator BolA	CDS	3.30499	6.48487e-06	0.000100656
b2392	mntH	Mn(2(+))/Fe(2(+)): H(+) symporter MntH	CDS	3.30224	0.00701917	0.0137249
b3565	xylA	xylose isomerase	CDS	3.28605	1.90067e-06	5.84194e-05
b3022	mqsR	mRNA interferase toxin MqsR	CDS	3.27608	0.000504712	0.00168648
b0286	paoA	aldehyde dehydrogenase, Fe-S subunit	CDS	3.27128	2.09998e-05	0.000196445
b1449	curA	NADPH-dependent curcumin/dihydrocurcumin reductase	CDS	3.23005	2.30485e-06	6.39789e-05
b1519	tam	trans-aconitate 2-methyltransferase	CDS	3.21798	1.75291e-06	5.77351e-05
b0953	rmf	ribosome modulation factor	CDS	3.1983	2.46989e-05	0.000217627
b2592	clpB	chaperone protein ClpB	CDS	3.19707	4.91928e-05	0.000332419
b1795	yeaQ	PF04226 family protein YeaQ	CDS	3.18448	9.89984e-06	0.000126488
b3153	yhbO	protein/nucleic acid deglycase 2	CDS	3.13541	0.000113811	0.000573377
b0419	yajO	1-deoxyxylulose-5-phosphate synthase YajO	CDS	3.13199	6.30257e-06	0.000100628
b4030	psiE	putative phosphate starvation-inducible protein PsiE	CDS	3.12922	2.0191e-05	0.000190559
b0363	yaiP	putative glucosyltransferase	CDS	3.09897	8.62898e-06	0.000115243
b1004	wrbA	NAD(P)H:quinone oxidoreductase	CDS	3.07582	2.54639e-05	0.000221609
b2877	mocA	molybdenum cofactor cytidylyltransferase	CDS	3.06639	1.15116e-05	0.000139685
b1155	tfaP	putative tail fiber assembly protein TfaP	CDS	3.06579	0.00111847	0.00312508
b1431	ydcL	DUF3313 domain-containing lipoprotein YdcL	CDS	3.06508	1.52299e-05	0.000161703
b3564	xylB	xylulokinase	CDS	3.06313	4.30522e-06	8.38728e-05
b0450	glnK	nitrogen regulatory protein PII-2	CDS	3.03748	0.0550715	0.0800714
b1597	asr	periplasmic chaperone Asr	CDS	2.9827	2.48769e-05	0.000218742
b1235	rssB	regulator of RpoS	CDS	2.97667	7.3367e-06	0.000106084
b1112	bhsA	DUF1471 domain-containing multiple stress resistance outer membrane protein BhsA	CDS	2.96802	6.94534e-06	0.000104408
b3221	nanQ	N-acetylneuraminate anomerase	CDS	2.95771	6.02864e-06	9.88558e-05
b1838	pphA	phosphoprotein phosphatase 1	CDS	2.93172	7.16399e-06	0.000105533
b4336	yjiN	DUF445 domain-containing protein YjiN	CDS	2.92922	6.93218e-06	0.000104408
b1467	narY	nitrate reductase Z subunit beta	CDS	2.91014	3.1979e-06	7.34134e-05
b2548	yphF	putative ABC transporter periplasmic binding protein YphF	CDS	2.8783	0.000109222	0.000554203
b1648	ydhL	DUF1289 domain-containing protein YdhL	CDS	2.86861	4.037e-06	8.15663e-05
b0358	yaiO	outer membrane protein YaiO	CDS	2.84653	9.58151e-06	0.000122939
b3021	mqsA	antitoxin of the MqsRA toxin-antitoxin system/DNA-binding transcriptional repressor MqsA	CDS	2.83785	0.000872899	0.00255448
b4269	ahr	NADPH-dependent aldehyde reductase Ahr	CDS	2.83175	8.16487e-06	0.000112427
b1166	ariR	putative two-component system connector protein AriR	CDS	2.82696	7.61021e-05	0.000433216
b1661	cfa	cyclopropane fatty acyl phospholipid synthase	CDS	2.82068	1.97963e-05	0.000188932
b1598	ydgD	putative serine protease YdgD	CDS	2.80579	2.54165e-05	0.000221609
b2975	glcA	glycolate/lactate:H(+) symporter GlcA	CDS	2.793	7.99447e-06	0.000110956
b1477	yddM	DNA-binding transcriptional regulator YddM	CDS	2.78039	1.60648e-05	0.000167634
b2372	yfdV	putative transport protein YfdV	CDS	2.77606	2.00659e-05	0.000190223
b2543	yphA	putative inner membrane protein	CDS	2.76577	4.41148e-06	8.49819e-05
b1466	narW	NarW, putative private chaperone for NarZ nitrate reductase subunit	CDS	2.7587	1.19281e-05	0.0001423
b1468	narZ	nitrate reductase Z subunit alpha	CDS	2.7536	1.93433e-05	0.000186283
b0836	bssR	regulator of biofilm formation	CDS	2.74846	5.21164e-05	0.000345302
b2257	arnT	lipid IVA 4-amino-4-deoxy-L-arabinosyltransferase	CDS	2.74136	0.000324309	0.00121032
b0581	ybdK	putative glutamate--cysteine ligase 2	CDS	2.70964	2.58416e-05	0.000223379
b0019	nhaA	Na(+):H(+) antiporter NhaA	CDS	2.67636	4.5274e-05	0.000318342
b2506	yfgI	nalidixic acid resistance protein YfgI	CDS	2.64253	0.000152974	0.000706158
b0346	mhpR	DNA-binding transcriptional activator MhpR	CDS	2.61406	0.00134708	0.00358013
b0506	allR	DNA-binding transcriptional repressor AllR	CDS	2.56272	6.55999e-05	0.000395743
b3496	dtpB	dipeptide/tripeptide:H(+) symporter DtpB	CDS	2.56125	2.53437e-05	0.000221609
b1167	ymgC	protein YmgC	CDS	2.55849	0.000266431	0.00106048
b1465	narV	nitrate reductase Z subunit gamma	CDS	2.55494	2.68885e-05	0.000228848
b0227	yafL	NlpC/P60 family protein YafL	CDS	2.53982	1.84839e-05	0.000180878
b1990	ldtA	L,D-transpeptidase LdtA	CDS	2.51361	2.94367e-05	0.000240419
b4238	nrdD	anaerobic ribonucleoside-triphosphate reductase	CDS	2.51269	6.71661e-05	0.000399168
b3003	yghA	NADP(+)-dependent aldehyde reductase	CDS	2.48606	0.123335	0.162863
b3222	nanK	N-acetylmannosamine kinase	CDS	2.47754	4.8167e-05	0.000327304
b4128	ghoS	antitoxin of the GhoTS toxin-antitoxin system	CDS	2.4513	7.2447e-05	0.00041748
b3530	bcsC	cellulose synthase outer membrane channel	CDS	2.4485	1.39216e-05	0.000153571
b2632	yfjP	putative GTP-binding protein YfjP	CDS	2.42895	0.00027204	0.00107402
b0139	htrE	putative fimbrial usher protein HtrE	CDS	2.42479	4.76369e-05	0.000326437
b4094	phnN	ribose 1,5-bisphosphate phosphokinase	CDS	2.40163	0.00033873	0.00125203
b4060	yjcB	uncharacterized protein YjcB	CDS	2.33523	0.000100816	0.0005286
b2009	sbmC	DNA gyrase inhibitor	CDS	2.31359	1.90107e-05	0.000184405
b1962	yedJ	putative HD superfamily phosphohydrolase YedJ	CDS	2.30825	1.9664e-05	0.000188092
b2015	yeeY	putative DNA-binding transcriptional regulator YeeY	CDS	2.2582	2.93787e-05	0.000240407
b1743	spy	ATP-independent periplasmic chaperone	CDS	2.20496	0.000132315	0.000639297
b0226	dinJ	antitoxin/DNA-binding transcriptional repressor DinJ	CDS	2.15299	3.59101e-05	0.000275787
b4156	yjeM	putative transporter YjeM	CDS	2.15245	0.000381938	0.00136425
b1511	lsrK	autoinducer-2 kinase	CDS	2.13471	2.46386e-05	0.000217547
b0124	gcd	quinoprotein glucose dehydrogenase	CDS	2.12037	0.000600759	0.0019432
b1957	yodC	protein YodC	CDS	2.1195	4.581e-05	0.000319992
b4732	ykiD	protein YkiD	CDS	2.10561	0.000251028	0.00101149
b3343	tusB	sulfurtransferase complex subunit TusB	CDS	2.05286	2.25739e-05	0.000204799
b1567	ydfW	protein YdfW	CDS	2.05275	0.0036015	0.00787225
b4189	bsmA	DUF1471 domain-containing putative lipoprotein BsmA	CDS	2.05114	0.000217631	0.000905267
b4188	yjfN	protease activator YjfN	CDS	2.03792	2.64458e-05	0.000225532
b2368	emrK	tripartite efflux pump membrane fusion protein EmrK	CDS	2.03468	0.00067115	0.00210265
b1463	nhoA	arylamine N-acetyltransferase	CDS	2.00267	3.43232e-05	0.000266491
b4468	glcE	glycolate dehydrogenase, putative FAD-binding subunit	CDS	1.98666	0.192496	0.240097
b1682	sufC	Fe-S cluster scaffold complex subunit SufC	CDS	1.97097	0.062718	0.0898358
b0385	dgcC	diguanylate cyclase DgcC	CDS	1.96535	6.27474e-05	0.000383925
b1338	abgA	p-aminobenzoyl-glutamate hydrolase subunit A	CDS	1.95801	9.63698e-05	0.000512885
b2452	eutH	putative ethanolamine permease EutH	CDS	1.95096	0.000106222	0.000545497
b4119	melA	alpha-galactosidase	CDS	1.94813	6.57642e-05	0.000396171
b4051	qorA	putative quinone oxidoreductase 1	CDS	1.90876	0.000148535	0.000692779
b0330	prpR	DNA-binding transcriptional dual regulator PrpR	CDS	1.90504	0.02918	0.0461899
b4555	yicS	uncharacterized protein YicS	CDS	1.89561	4.80512e-05	0.000327304
b3876	yihO	putative sulfoquinovose transporter	CDS	1.85842	0.000113387	0.000571918
b1423	ydcJ	DUF1338 domain-containing protein YdcJ	CDS	1.81516	0.000105356	0.000543678
b4263	yjgR	DUF853 domain-containing protein YjgR	CDS	1.80814	3.91515e-05	0.000291202
b1683	sufB	Fe-S cluster scaffold complex subunit SufB	CDS	1.80196	0.167933	0.21309
b3129	prlF	antitoxin PrlF	CDS	1.79813	9.83714e-05	0.000520894
b0232	yafN	antitoxin YafN	CDS	1.79666	5.55868e-05	0.000357331
b4212	ytfH	putative transcriptional regulator YtfH	CDS	1.79591	0.00294513	0.00668875
b3238	yhcN	DUF1471 domain-containing stress-induced protein YhcN	CDS	1.78988	0.000357803	0.00130055
b0146	sfsA	sugar fermentation stimulation protein A	CDS	1.76576	0.000122358	0.000608495
b1358	ydaT	protein YdaT	CDS	1.76209	0.00107656	0.00302591
b1306	pspC	phage shock protein C	CDS	1.75546	7.40502e-05	0.000424988
b0443	fadM	long-chain acyl-CoA thioesterase FadM	CDS	1.74415	0.000162737	0.000737209
b1372	stfR	putative prophage side tail fiber protein StfR	CDS	1.72478	4.74381e-05	0.000326437
b1205	ychH	stress-induced protein	CDS	1.72408	0.00790179	0.0152125
b1164	ycgZ	putative two-component system connector protein YcgZ	CDS	1.71861	0.000195103	0.000837803
b0802	ybiJ	DUF1471 domain-containing protein YbiJ	CDS	1.6576	0.000106493	0.000545569
b1165	ymgA	putative two-component system connector protein YmgA	CDS	1.64568	0.000767749	0.00232736
b3094	exuR	DNA-binding transcriptional repressor ExuR	CDS	1.61884	0.00087141	0.00255233
b2164	psuT	putative pseudouridine transporter	CDS	1.55817	8.72488e-05	0.00047445
b1726	yniB	uncharacterized protein YniB	CDS	1.53749	0.000254714	0.00102344
b1127	pepT	peptidase T	CDS	1.53531	0.000262489	0.00104675
b3106	yhaK	bicupin-related protein	CDS	1.53449	0.00127568	0.00344425
b1406	pdxI	pyridoxal reductase	CDS	1.48845	0.000209892	0.00088346
b3593	rhsA	rhs element protein RhsA	CDS	1.48279	0.000295873	0.00113511
b0267	yagA	integrase core domain-containing protein YagA	CDS	1.47967	0.000928361	0.0026858
b3879	yihR	putative sulfoquinovose mutarotase YihR	CDS	1.4686	0.00321253	0.00716952
b2295	yfbV	PF04217 family membrane protein YfbV	CDS	1.46209	0.00060598	0.00195711
b0631	ybeD	DUF493 domain-containing protein YbeD	CDS	1.44048	0.00376338	0.0081588
b2473	ypfH	esterase YpfH	CDS	1.41109	0.00019837	0.000846711
b1357	ydaS	toxin YdaS	CDS	1.40728	0.00227186	0.00544811
b3524	yhjG	AsmA family protein YhjG	CDS	1.40472	0.00456512	0.00958382
b4031	xylE	D-xylose:H(+) symporter	CDS	1.31141	0.000755374	0.00229907
b0231	dinB	DNA polymerase IV	CDS	1.24019	0.000421784	0.0014604
b1649	nemR	DNA-binding transcriptional repressor NemR	CDS	1.23004	0.000567117	0.00186276
b0999	cbpM	chaperone modulator CbpM	CDS	1.20341	0.00260742	0.00609787
b1927	amyA	alpha-amylase	CDS	1.19951	0.000724011	0.00221853
b1512	lsrR	DNA-binding transcriptional repressor LsrR	CDS	1.15696	0.000933762	0.00269775
b3284	smg	DUF494 domain-containing protein Smg	CDS	1.13296	0.00173031	0.00437678
b1958	yedI	DUF808 domain-containing inner membrane protein YedI	CDS	1.12551	0.000633673	0.00202651
b1368	ynaA	putative prophage tail length tape measure domain-containing protein YnaA	CDS	1.12144	0.00185862	0.00463238
b1060	bssS	regulator of biofilm formation	CDS	1.11534	0.00367403	0.00801007
b3039	ygiD	4,5-DOPA dioxygenase extradiol	CDS	1.11154	0.00134389	0.00357389
b0866	ybjQ	putative heavy metal binding protein YbjQ	CDS	1.10805	0.00327764	0.00729567
b3449	ugpQ	glycerophosphodiester phosphodiesterase UgpQ	CDS	1.10461	0.00217478	0.00526584
b1529	marC	inner membrane protein MarC	CDS	1.07925	0.00130619	0.0035088
b1684	sufA	iron-sulfur cluster insertion protein SufA	CDS	1.07095	0.540602	0.592041
b3101	yqjF	DoxX family protein	CDS	1.044	0.00985255	0.0183364
