# Supplementary material for: Mechanism of persister formation in response to nitrogen starvation
Source: Research Square preprint supplement (doi:10.21203/rs.3.rs-7237366/v1), 2025-08-13
Supplement: Supplementary file 2 [file 8d032f62747b3b26e2a265bd.xlsx]

## Sheet: strains-plasmid
Strains/Plasmid	Genotype and description
Strains
DH5⍺	Reference strain
MG1655 WT	Reference strain
BW25112	Reference strain
BW25112Δnac	Keio collection, nac::kan ; Kanamycin 50 R
DE2	MG1655 ΔmotA743::kan-glmS::PRNAI-mKate2-T1 terminator
Plasmids
pMMB67-EH	Overexpression plasmid with arabinose inducible promoter (empty)
pMMB67-glnA	Plasmid for glnA overexpression under anhydrotetracycline inducible promoter
pMMB67-amtB	Plasmid for amtB overexpression under anhydrotetracycline inducible promoter
pMMB67-carAB	Plasmid for carAB overexpression under anhydrotetracycline inducible promoter
pMMB67-pyrBI	Plasmid for pyrBI overexpression under anhydrotetracycline inducible promoter
pMMB67-nac	Plasmid for nac overexpression under anhydrotetracycline inducible promoter
pMMB-amtB-mVenus	Fluorescent reporter containing glnK-amtB-mVenus transcription unit to track AmtB expression
pMMB-pyrBI-mVenus	Fluorescent reporter containing pyrLBI-mVenus transcription unit to track PyrBI expression

## Sheet: Primers
Primers	Purpose	Type	Sequence 5'-3'
RT13	amplify backbone of pMMB	Forward	tttcacacaggaaacagaattcgagc
RT20	amplify backbone of pMMB	Reverse	agggcaatcagctgttgccc
RT30	amplify TetR and anhydrotetracyclin inducible promoter	Forward	gggcaacagctgattgccctgagctcggtaccttaagacccact
RT40	amplify TetR and anhydrotetracyclin inducible promoter	Reverse	agatcctttctcctctttggatcctttgaatt
RT41	amplify glnA coding sequence	Forward	ggagaaaggatctatgtccgctgaacacgtactgacg
RT42	amplify glnA coding sequence	Reverse	tgtttcctgtgtgaaattagacgctgtagtacagctcaaactctacc
RT43	amplify amtB coding sequence	Forward	ggagaaaggatctatgaagatagcgacgataaaaactgggcttg
Rt44	amplify amtB coding sequence	Reverse	tgtttcctgtgtgaaattacgcgttataggcattctcgccg
RT38	amplify carABcoding sequence	Forward	aggagaaaggatctatgattaagtcagcgctattggttctgg
RT39	amplify carAB coding sequence	Reverse	tttcctgtgtgaaattatttgatctgtgcgtgcatttcctgca
RT36	amplify pyrBI coding sequence	Forward	ggagaaaggatctatggctaatccgctatatcagaaacatatcatttcc
RT37	amplify pyrBI coding sequence	Reverse	tgtttcctgtgtgaaattaattggccagcaccacattatggg
RT53	amplify pyrLBI transcriptional unit	Forward	gggcaacagctgattgcccgcaatagtgttagccgttcgct
RT56	amplify pyrLBI transcriptional unit	Reverse	ccttgctcaccgcggccgcactagttttggccagcaccacattatgg
RT55	amplify mVenus in fusion with pyrI	Forward	Actagtgcggccgcggtgagcaagggcgaggagc
RT28	amplify mVenus in fusion with amtB	Forward	caacagccacggcgagaatgcctataacgcgactagtgcggccgcggtgagcaagggcgaggag
RT24	amplify mVenus fusion	Reverse	attctgtttcctgtgtgaaattacttgtaaagctcgtccatgccg
