# Supplementary material for: Mechanism of persister formation in response to nitrogen starvation
Source: Research Square preprint supplement (doi:10.21203/rs.3.rs-7237366/v1), 2025-08-13
Supplement: Supplementary file 3 [file 8d14a386057e16f9eb767604.xlsx]

## Sheet: strains-plasmid
Strains/Plasmid	Genotype and description
Strains
DH5⍺	Reference strain
MG1655 WT	Reference strain
BW25112	Reference strain
BW25112Δnac	Keio collection, nac::kan ; Kanamycin 50 R
DE2	MG1655 ΔmotA743::kan-glmS::PRNAI-mKate2-T1 terminator
Plasmids
pMMB67-EH	Overexpression plasmid with arabinose inducible promoter (empty)
pMMB67-glnA	Plasmid for glnA overexpression under anhydrotetracycline inducible promoter
pMMB67-amtB	Plasmid for amtB overexpression under anhydrotetracycline inducible promoter
pMMB67-carAB	Plasmid for carAB overexpression under anhydrotetracycline inducible promoter
pMMB67-pyrBI	Plasmid for pyrBI overexpression under anhydrotetracycline inducible promoter
pMMB67-nac	Plasmid for nac overexpression under anhydrotetracycline inducible promoter
pMMB-amtB-mVenus	Fluorescent reporter containing glnK-amtB-mVenus transcription unit to track AmtB expression
pMMB-pyrBI-mVenus	Fluorescent reporter containing pyrLBI-mVenus transcription unit to track PyrBI expression

## Sheet: Primers
Primers	Purpose	Type	Sequence 5'-3'	Constructs
RT13	amplify backbone of pMMB	Forward	tttcacacaggaaacagaattcgagc	pMMB backbones
RT20	amplify backbone of pMMB	Reverse	agggcaatcagctgttgccc	pMMB backbones
RT30	amplify TetR and anhydrotetracyclin inducible promoter	Forward	gggcaacagctgattgccctgagctcggtaccttaagacccact	pMMB overexpression
RT40	amplify TetR and anhydrotetracyclin inducible promoter	Reverse	agatcctttctcctctttggatcctttgaatt	pMMB overexpression
RT41	amplify glnA coding sequence	Forward	ggagaaaggatctatgtccgctgaacacgtactgacg	pMMB-glnA+
RT42	amplify glnA coding sequence	Reverse	tgtttcctgtgtgaaattagacgctgtagtacagctcaaactctacc	pMMB-glnA+
RT43	amplify amtB coding sequence	Forward	ggagaaaggatctatgaagatagcgacgataaaaactgggcttg	pMMB-amtB+
Rt44	amplify amtB coding sequence	Reverse	tgtttcctgtgtgaaattacgcgttataggcattctcgccg	pMMB-amtB+
RT38	amplify carABcoding sequence	Forward	aggagaaaggatctatgattaagtcagcgctattggttctgg	pMMB-carAB+
RT39	amplify carAB coding sequence	Reverse	tttcctgtgtgaaattatttgatctgtgcgtgcatttcctgca	pMMB-carAB+
RT36	amplify pyrBI coding sequence	Forward	ggagaaaggatctatggctaatccgctatatcagaaacatatcatttcc	pMMB-pyrBI+
RT37	amplify pyrBI coding sequence	Reverse	tgtttcctgtgtgaaattaattggccagcaccacattatggg	pMMB-pyrBI+
RT47	amplify amtB transcriptional unit	Forward	acagctgattgccctatagcgcaatatttcatcgttggtgcaaaaa	pMMB-amtB-mVenus
RT54	amplify amtB transcriptional unit	Reverse	ccttgctcaccgcggccgcactagtcgcgttataggcattctcgccg	pMMB-amtB-mVenus
RT53	amplify pyrLBI transcriptional unit	Forward	gggcaacagctgattgcccgcaatagtgttagccgttcgct	pMMB-pyrBI-mVenus
RT56	amplify pyrLBI transcriptional unit	Reverse	ccttgctcaccgcggccgcactagttttggccagcaccacattatgg	pMMB-pyrBI-mVenus
RT55	amplify mVenus in fusion with pyrI	Forward	Actagtgcggccgcggtgagcaagggcgaggagc	pMMB-pyrBI-mVenus
RT28	amplify mVenus in fusion with amtB	Forward	caacagccacggcgagaatgcctataacgcgactagtgcggccgcggtgagcaagggcgaggag	pMMB-amtB-mVenus
RT24	amplify mVenus fusion	Reverse	attctgtttcctgtgtgaaattacttgtaaagctcgtccatgccg	pMMB based fluorescent reporters
