# Supplementary material for: Mechanism of persister formation in response to nitrogen starvation
Source: Research Square preprint supplement (doi:10.21203/rs.3.rs-7237366/v1), 2025-08-13
Supplement: Supplementary file 4 [file f31dd03b027f1712b28a1a37.xlsx]

## Sheet: Sheet1
Locustag	Gene	Description	FeatureType	logFC	PValue	Benjamini_Hochberg_Adjusted_PValue
b4245	pyrB	aspartate carbamoyltransferase catalytic subunit	CDS	-10.1715	1.30044e-05	0.000148891
b1073	flgB	flagellar basal-body rod protein FlgB	CDS	-10.0068	6.5451e-08	4.3847e-05
b4244	pyrI	aspartate carbamoyltransferase, PyrI subunit	CDS	-7.61901	8.17286e-08	4.3847e-05
b0032	carA	carbamoyl-phosphate synthetase small subunit	CDS	-6.80333	1.7994e-07	4.3847e-05
b0557	borD	prophage lipoprotein BorD	CDS	-6.62307	1.38289e-07	4.3847e-05
b3829	metE	cobalamin-independent homocysteine transmethylase	CDS	-6.5406	6.95725e-06	0.000104408
b0033	carB	carbamoyl-phosphate synthetase large subunit	CDS	-6.38576	1.44855e-06	5.64403e-05
b2093	gatB	galactitol-specific PTS enzyme IIB component	CDS	-6.34535	9.54695e-08	4.3847e-05
b4669	ilvX	uncharacterized protein IlvX	CDS	-6.1277	6.86062e-05	0.000403388
b4678	yoeI	uncharacterized protein YoeI	CDS	-5.90271	0.00085137	0.00250053
b2169	fruB	fructose-specific PTS multiphosphoryl transfer protein FruB	CDS	-5.74391	3.87431e-07	4.48756e-05
b1600	mdtJ	multidrug/spermidine efflux pump membrane subunit MdtJ	CDS	-5.38312	6.62851e-06	0.000101997
b1888	cheA	chemotaxis protein CheA	CDS	-5.3652	1.62116e-06	5.77351e-05
b4035	malK	maltose ABC transporter ATP binding subunit	CDS	-5.16186	4.15877e-07	4.48756e-05
b0929	ompF	outer membrane porin F	CDS	-5.06601	2.03723e-05	0.000191362
b4557	yidD	membrane protein insertion efficiency factor	CDS	-5.02491	9.4019e-06	0.000121737
b4242	mgtA	Mg(2(+)) importing P-type ATPase	CDS	-4.92683	0.000247321	0.00100035
b4254	argI	ornithine carbamoyltransferase ArgI	CDS	-4.88988	3.15468e-07	4.44829e-05
b4034	malE	maltose ABC transporter periplasmic binding protein	CDS	-4.84948	2.39024e-07	4.3847e-05
b3231	rplM	50S ribosomal subunit protein L13	CDS	-4.84285	5.90673e-06	9.86433e-05
b2498	upp	uracil phosphoribosyltransferase	CDS	-4.75671	9.30678e-07	5.47695e-05
b1849	purT	phosphoribosylglycinamide formyltransferase 2	CDS	-4.73575	1.0015e-06	5.47695e-05
b2094	gatA	galactitol-specific PTS enzyme IIA component	CDS	-4.72026	1.21356e-06	5.47695e-05
b3230	rpsI	30S ribosomal subunit protein S9	CDS	-4.68659	4.59685e-06	8.63841e-05
b0724	sdhB	succinate:quinone oxidoreductase, iron-sulfur cluster binding protein	CDS	-4.67515	5.8717e-06	9.86433e-05
b3941	metF	5,10-methylenetetrahydrofolate reductase	CDS	-4.55508	0.000117151	0.000588107
b0729	sucD	succinyl-CoA synthetase subunit alpha	CDS	-4.49312	4.86611e-06	9.03537e-05
b2497	uraA	uracil:H(+) symporter UraA	CDS	-4.34959	2.30487e-06	6.39789e-05
b2677	proV	glycine betaine ABC transporter ATP binding subunit ProV	CDS	-4.33658	0.0645785	0.0921899
b2838	lysA	diaminopimelate decarboxylase	CDS	-4.29659	0.000205349	0.000867777
b4036	lamB	maltose outer membrane channel/phage lambda receptor protein	CDS	-4.28144	1.59477e-06	5.77351e-05
b2606	rplS	50S ribosomal subunit protein L19	CDS	-4.25675	1.67877e-05	0.000171801
b1558	cspF	cold shock-like protein CspF	CDS	-4.24595	0.000161524	0.000733456
b3774	ilvC	ketol-acid reductoisomerase (NADP(+))	CDS	-4.22823	1.43507e-06	5.64403e-05
b3214	gltF	periplasmic protein GltF	CDS	-4.22261	6.43189e-07	4.90866e-05
b0726	sucA	subunit of E1(0) component of 2-oxoglutarate dehydrogenase	CDS	-4.10802	8.30944e-06	0.000112748
b0727	sucB	dihydrolipoyltranssuccinylase	CDS	-4.08319	1.29591e-05	0.000148891
b3748	rbsD	D-ribose pyranase	CDS	-4.07454	4.48134e-06	8.53464e-05
b3917	sbp	sulfate/thiosulfate ABC transporter periplasmic binding protein Sbp	CDS	-4.04106	0.0668631	0.095036
b0945	pyrD	dihydroorotate dehydrogenase, type 2	CDS	-4.03927	2.61669e-06	6.52606e-05
b0023	rpsT	30S ribosomal subunit protein S20	CDS	-4.03437	1.37905e-05	0.000153315
b0723	sdhA	succinate:quinone oxidoreductase, FAD binding protein	CDS	-4.00622	1.38579e-05	0.000153315
b3958	argC	N-acetylglutamylphosphate reductase	CDS	-3.99388	3.39775e-06	7.47682e-05
b3315	rplV	50S ribosomal subunit protein L22	CDS	-3.97132	8.78844e-06	0.000116639
b0860	artJ	L-arginine ABC transporter periplasmic binding protein	CDS	-3.94594	3.85471e-06	8.01343e-05
b3319	rplD	50S ribosomal subunit protein L4	CDS	-3.93539	1.39814e-05	0.000153832
b3316	rpsS	30S ribosomal subunit protein S19	CDS	-3.92742	6.77253e-06	0.000103464
b2096	gatY	tagatose-1,6-bisphosphate aldolase 2	CDS	-3.91506	3.84782e-06	8.01343e-05
b2499	purM	phosphoribosylformylglycinamide cyclo-ligase	CDS	-3.91213	3.07499e-05	0.000246871
b3643	rph	truncated RNase PH	CDS	-3.91025	2.96645e-06	6.96051e-05
b0406	tgt	tRNA-guanine transglycosylase	CDS	-3.87867	3.35597e-06	7.47682e-05
b3704	rnpA	RNase P protein component	CDS	-3.86468	6.45486e-06	0.000100656
b3314	rpsC	30S ribosomal subunit protein S3	CDS	-3.85999	1.65808e-05	0.000171335
b0523	purE	N(5)-carboxyaminoimidazole ribonucleotide mutase	CDS	-3.84346	1.95918e-06	5.84251e-05
b4243	ridA	enamine/imine deaminase, redox-regulated chaperone	CDS	-3.80629	3.48824e-06	7.50863e-05
b2014	plaP	putrescine:H(+) symporter PlaP	CDS	-3.78133	8.36993e-05	0.000459265
b4469	ygiQ	radical SAM superfamily protein YgiQ	CDS	-3.77913	1.09177e-06	5.47695e-05
b3317	rplB	50S ribosomal subunit protein L2	CDS	-3.77018	1.59734e-05	0.000167091
b3636	rpmG	50S ribosomal subunit protein L33	CDS	-3.75896	1.92576e-06	5.84194e-05
b0728	sucC	succinyl-CoA synthetase subunit beta	CDS	-3.75779	1.47021e-05	0.000158477
b0721	sdhC	succinate:quinone oxidoreductase, membrane protein SdhC	CDS	-3.75457	6.20691e-06	9.98512e-05
b3318	rplW	50S ribosomal subunit protein L23	CDS	-3.75425	1.4282e-05	0.000155927
b0989	cspH	CspA family protein CspH	CDS	-3.74197	4.48774e-05	0.000316602
b3542	dppC	dipeptide ABC transporter membrane subunit DppC	CDS	-3.73907	2.1834e-05	0.000200712
b2095	gatZ	putative tagatose-1,6-bisphosphate aldolase 2 chaperone	CDS	-3.72898	5.74919e-06	9.86433e-05
b0553	nmpC	putative outer membrane porin NmpC	CDS	-3.69376	1.33278e-06	5.55906e-05
b0273	argF	ornithine carbamoyltransferase ArgF	CDS	-3.68813	1.3613e-06	5.55906e-05
b3637	rpmB	50S ribosomal subunit protein L28	CDS	-3.67046	7.62763e-06	0.000108343
b3750	rbsC	ribose ABC transporter membrane subunit	CDS	-3.65188	3.69759e-06	7.81276e-05
b2551	glyA	serine hydroxymethyltransferase	CDS	-3.64613	7.82887e-06	0.000109372
b3736	atpF	ATP synthase Fo complex subunit b	CDS	-3.59817	8.29366e-06	0.000112748
b4201	priB	primosomal replication protein N	CDS	-3.58899	6.85139e-05	0.000403388
b3735	atpH	ATP synthase F1 complex subunit delta	CDS	-3.5786	1.48105e-05	0.000158839
b3320	rplC	50S ribosomal subunit protein L3	CDS	-3.57658	2.04113e-05	0.000191362
b3983	rplK	50S ribosomal subunit protein L11	CDS	-3.55843	3.74075e-05	0.000283696
b3737	atpE	ATP synthase Fo complex subunit c	CDS	-3.55162	6.83905e-06	0.000104106
b0436	tig	trigger factor	CDS	-3.5412	1.26535e-05	0.000148043
b3984	rplA	50S ribosomal subunit protein L1	CDS	-3.50879	3.6522e-05	0.000279475
b2607	trmD	tRNA m(1)G37 methyltransferase	CDS	-3.49562	5.61998e-05	0.000358965
b2913	serA	phosphoglycerate dehydrogenase	CDS	-3.49498	0.000127711	0.000624152
b4202	rpsR	30S ribosomal subunit protein S18	CDS	-3.49173	8.41227e-06	0.00011306
b3212	gltB	glutamate synthase subunit GltB	CDS	-3.48922	5.80446e-05	0.000366293
b2608	rimM	ribosome maturation factor RimM	CDS	-3.48425	8.11723e-05	0.000450639
b4200	rpsF	30S ribosomal subunit protein S6	CDS	-3.44962	6.28274e-05	0.000383925
b1415	aldA	aldehyde dehydrogenase A	CDS	-3.4421	2.58963e-05	0.000223379
b3541	dppD	dipeptide ABC transporter ATP binding subunit DppD	CDS	-3.44138	6.62159e-05	0.000397424
b3321	rpsJ	30S ribosomal subunit protein S10	CDS	-3.43009	1.07906e-05	0.000134788
b3261	fis	DNA-binding transcriptional dual regulator Fis	CDS	-3.42336	3.94805e-05	0.000292181
b2609	rpsP	30S ribosomal subunit protein S16	CDS	-3.419	5.4991e-05	0.000357331
b3738	atpB	ATP synthase Fo complex subunit a	CDS	-3.41881	5.89218e-06	9.86433e-05
b2352	yfdI	serotype-specific glucosyl transferase YfdI	CDS	-3.40763	5.80098e-06	9.86433e-05
b0722	sdhD	succinate:quinone oxidoreductase, membrane protein SdhD	CDS	-3.38719	9.26976e-06	0.000121134
b0411	tsx	nucleoside-specific channel-forming protein Tsx	CDS	-3.3787	6.87674e-06	0.000104305
b3540	dppF	dipeptide ABC transporter ATP binding subunit DppF	CDS	-3.36821	3.58889e-05	0.000275787
b3294	rplQ	50S ribosomal subunit protein L17	CDS	-3.36591	1.12817e-05	0.000138436
b3543	dppB	dipeptide ABC transporter membrane subunit DppB	CDS	-3.36478	0.000561084	0.0018458
b1282	yciH	putative translation factor	CDS	-3.35225	5.5661e-06	9.80392e-05
b3734	atpA	ATP synthase F1 complex subunit alpha	CDS	-3.33872	3.66987e-05	0.000280323
b0685	ybfE	ribbon-helix-helix domain-containing protein YbfE	CDS	-3.33255	0.000317521	0.0011922
b0336	codB	cytosine transporter	CDS	-3.3287	7.74899e-06	0.000109177
b3732	atpD	ATP synthase F1 complex subunit beta	CDS	-3.32404	3.42678e-05	0.000266491
b0434	yajG	putative lipoprotein YajG	CDS	-3.3227	2.15725e-05	0.000199559
b3213	gltD	glutamate synthase subunit GltD	CDS	-3.31058	1.73642e-05	0.000174339
b1172	ymgG	PF13436 family protein YmgG	CDS	-3.30176	4.44399e-05	0.000314037
b0238	gpt	xanthine-guanine phsophoribosyltransferase	CDS	-3.30014	0.00567787	0.0115267
b1892	flhD	DNA-binding transcriptional dual regulator FlhD	CDS	-3.28634	2.26644e-05	0.000204799
b0002	thrA	fused aspartate kinase/homoserine dehydrogenase 1	CDS	-3.2696	1.2426e-05	0.000146492
b3313	rplP	50S ribosomal subunit protein L16	CDS	-3.26251	2.80985e-05	0.000234726
b3654	xanP	xanthine:H(+) symporter XanP	CDS	-3.25563	6.64034e-05	0.000397424
b2091	gatD	galactitol-1-phosphate 5-dehydrogenase	CDS	-3.20602	1.28728e-05	0.000148891
b2174	lpxT	lipid A-core phosphotransferase	CDS	-3.18904	7.73254e-06	0.000109177
b3980	tufB	translation elongation factor Tu 2	CDS	-3.18178	2.45257e-05	0.000217001
b3186	rplU	50S ribosomal subunit protein L21	CDS	-3.14845	1.05652e-05	0.000132362
b3959	argB	acetylglutamate kinase	CDS	-3.1441	5.89823e-06	9.86433e-05
b3311	rpsQ	30S ribosomal subunit protein S17	CDS	-3.14135	9.93001e-05	0.000524537
b3733	atpG	ATP synthase F1 complex subunit gamma	CDS	-3.13593	5.64608e-05	0.000358965
b1983	yeeN	putative transcriptional regulator YeeN	CDS	-3.12984	5.51667e-06	9.80392e-05
b1807	tsaB	N(6)-L-threonylcarbamoyladenine synthase, TsaB subunit	CDS	-3.1282	1.34665e-05	0.000150903
b3739	atpI	ATP synthase accessory factor AtpI	CDS	-3.11152	7.58757e-06	0.000108136
b3165	rpsO	30S ribosomal subunit protein S15	CDS	-3.04192	4.1739e-05	0.000302501
b1780	yeaD	putative aldose 1-epimerase YeaD	CDS	-3.02555	7.05585e-06	0.000104528
b2533	suhB	Nus factor SuhB	CDS	-3.02302	8.26835e-05	0.000455859
b1915	yecF	DUF2594 domain-containing protein YecF	CDS	-3.0228	0.00010264	0.000536837
b3312	rpmC	50S ribosomal subunit protein L29	CDS	-3.01236	6.19994e-06	9.98512e-05
b0522	purK	5-(carboxyamino)imidazole ribonucleotide synthase	CDS	-3.00824	3.39024e-06	7.47682e-05
b2185	rplY	50S ribosomal subunit protein L25	CDS	-3.00791	1.70264e-05	0.000172169
b3523	yhjE	putative transporter YhjE	CDS	-3.00086	4.93241e-05	0.000332419
b0474	adk	adenylate kinase	CDS	-2.97535	3.0264e-05	0.000245121
b1160	iraM	anti-adaptor protein IraM	CDS	-2.96285	0.000386709	0.00137781
b3731	atpC	ATP synthase F1 complex subunit epsilon	CDS	-2.9608	2.76361e-05	0.000231958
b3260	dusB	tRNA-dihydrouridine synthase B	CDS	-2.95925	2.76287e-05	0.000231958
b1839	yebY	DUF2511 domain-containing protein YebY	CDS	-2.95848	4.25315e-06	8.35839e-05
b4226	ppa	inorganic pyrophosphatase	CDS	-2.95602	1.54088e-05	0.000163195
b3458	livK	L-leucine/L-phenylalanine ABC transporter periplasmic binding protein	CDS	-2.93873	1.13109e-05	0.000138436
b3749	rbsA	ribose ABC transporter ATP binding subunit	CDS	-2.93167	0.000288324	0.00111522
b3295	rpoA	RNA polymerase subunit alpha	CDS	-2.92409	0.00012548	0.000617057
b0797	rhlE	ATP-dependent RNA helicase RhlE	CDS	-2.91827	6.51671e-06	0.000100656
b1840	yebZ	CopD family protein	CDS	-2.91401	7.06509e-05	0.000411033
b0405	queA	tRNA preQ1(34) S-adenosylmethionine ribosyltransferase-isomerase	CDS	-2.89471	2.03964e-05	0.000191362
b2313	cvpA	colicin V production protein	CDS	-2.89242	3.47178e-06	7.50863e-05
b3304	rplR	50S ribosomal subunit protein L18	CDS	-2.88919	7.66413e-05	0.000433416
b3403	pck	phosphoenolpyruvate carboxykinase (ATP)	CDS	-2.85293	5.65526e-06	9.8434e-05
b2557	purL	phosphoribosylformylglycinamide synthetase	CDS	-2.82779	3.10882e-05	0.00024818
b4203	rplI	50S ribosomal subunit protein L9	CDS	-2.8257	1.90179e-05	0.000184405
b3303	rpsE	30S ribosomal subunit protein S5	CDS	-2.82316	7.23864e-05	0.00041748
b3185	rpmA	50S ribosomal subunit protein L27	CDS	-2.82103	1.23117e-05	0.000145649
b2153	folE	GTP cyclohydrolase 1	CDS	-2.81002	0.000613106	0.00197562
b0431	cyoB	cytochrome bo3 subunit 1	CDS	-2.76578	0.000755554	0.00229907
b2518	ndk	nucleoside diphosphate kinase	CDS	-2.7554	4.4598e-06	8.53188e-05
b2963	mltC	membrane-bound lytic murein transglycosylase C	CDS	-2.75003	3.03153e-05	0.000245121
b0433	ampG	muropeptide:H(+) symporter	CDS	-2.72532	3.31262e-05	0.000260531
b2019	hisG	ATP phosphoribosyltransferase	CDS	-2.72071	9.32268e-05	0.000498658
b0565	ompT	omptin family outer membrane protease OmpT	CDS	-2.7113	1.47796e-05	0.000158839
b0034	caiF	DNA-binding transcriptional activator CaiF	CDS	-2.68426	1.74916e-05	0.000174793
b1820	yobD	DUF986 domain-containing inner membrane protein YobD	CDS	-2.67237	2.41554e-05	0.000214619
b2765	queD	6-carboxy-5,6,7,8-tetrahydropterin synthase	CDS	-2.6711	0.0152758	0.0265235
b3705	yidC	membrane protein insertase YidC	CDS	-2.67097	0.000102066	0.000534492
b4005	purD	phosphoribosylamine--glycine ligase	CDS	-2.65926	1.04806e-05	0.000132246
b2939	yqgB	acid stress response protein YqgB	CDS	-2.65734	8.98571e-05	0.000484909
b0120	speD	S-adenosylmethionine decarboxylase proenzyme	CDS	-2.65667	1.64619e-05	0.000170521
b2508	guaB	inosine 5'-monophosphate dehydrogenase	CDS	-2.64962	0.000291529	0.00112445
b1809	yoaB	RutC family protein YoaB	CDS	-2.63811	6.41295e-06	0.000100656
b3985	rplJ	50S ribosomal subunit protein L10	CDS	-2.63662	0.000112777	0.000569625
b0337	codA	cytosine/isoguanine deaminase	CDS	-2.63267	2.58093e-05	0.000223379
b1550	gnsB	protein GnsB	CDS	-2.62657	7.94723e-05	0.000445595
b0004	thrC	threonine synthase	CDS	-2.62552	3.25835e-05	0.000257695
b2679	proX	glycine betaine ABC transporter periplasmic binding protein ProX	CDS	-2.62193	0.0166121	0.0284125
b2507	guaA	GMP synthetase	CDS	-2.61922	3.58114e-05	0.000275787
b4052	dnaB	replicative DNA helicase	CDS	-2.61806	8.07333e-05	0.000448788
b2500	purN	phosphoribosylglycinamide formyltransferase 1	CDS	-2.61302	1.04946e-05	0.000132246
b1131	purB	adenylosuccinate lyase	CDS	-2.61108	5.5223e-05	0.000357331
b2678	proW	glycine betaine ABC transporter membrane subunit ProW	CDS	-2.60756	0.0223405	0.0364745
b0432	cyoA	cytochrome bo3 subunit 2	CDS	-2.58798	0.000282194	0.00109751
b3918	cdh	CDP-diacylglycerol diphosphatase	CDS	-2.58722	0.000356578	0.00129879
b3310	rplN	50S ribosomal subunit protein L14	CDS	-2.58156	8.42733e-05	0.000461783
b3960	argH	argininosuccinate lyase	CDS	-2.56473	3.85526e-05	0.000288124
b1281	pyrF	orotidine-5'-phosphate decarboxylase	CDS	-2.55892	1.15472e-05	0.000139718
b0268	yagE	putative 2-dehydro-3-deoxygluconate aldolase	CDS	-2.53113	0.00163171	0.00418977
b3309	rplX	50S ribosomal subunit protein L24	CDS	-2.53094	7.95294e-05	0.000445595
b1633	nth	endonuclease III	CDS	-2.52227	2.86959e-05	0.000237566
b0905	ycaO	ribosomal protein S12 methylthiotransferase accessory factor YcaO	CDS	-2.52067	8.97032e-06	0.000118682
b3306	rpsH	30S ribosomal subunit protein S8	CDS	-2.51072	3.72212e-05	0.000282788
b1126	potA	spermidine preferential ABC transporter ATP binding subunit	CDS	-2.50605	1.56202e-05	0.00016462
b3296	rpsD	30S ribosomal subunit protein S4	CDS	-2.49376	7.66014e-05	0.000433416
b1782	mipA	MltA-interacting protein	CDS	-2.48881	3.29825e-05	0.000260307
b3308	rplE	50S ribosomal subunit protein L5	CDS	-2.48744	0.000169386	0.000760447
b3893	fdoH	formate dehydrogenase O subunit beta	CDS	-2.48466	1.95197e-05	0.000187133
b3301	rplO	50S ribosomal subunit protein L15	CDS	-2.47844	0.000100551	0.000527863
b2312	purF	amidophosphoribosyltransferase	CDS	-2.46451	3.85542e-05	0.000288124
b0005	yaaX	DUF2502 domain-containing protein YaaX	CDS	-2.4493	5.27265e-05	0.000347177
b2156	lysP	lysine:H(+) symporter	CDS	-2.449	5.92836e-05	0.0003701
b1125	potB	spermidine preferential ABC transporter membrane subunit PotB	CDS	-2.44642	1.34168e-05	0.000150903
b1631	rsxG	SoxR [2Fe-2S] reducing system protein RsxG	CDS	-2.44109	5.16686e-05	0.000342869
b3671	ilvB	acetohydroxy acid synthase I subunit IlvB	CDS	-2.42836	3.03587e-05	0.000245121
b3986	rplL	50S ribosomal subunit protein L12	CDS	-2.42465	9.65986e-05	0.000512895
b3771	ilvD	dihydroxy-acid dehydratase	CDS	-2.41505	1.80107e-05	0.000177474
b3302	rpmD	50S ribosomal subunit protein L30	CDS	-2.40925	7.09736e-05	0.000412346
b3175	secG	Sec translocon subunit SecG	CDS	-2.40786	4.3963e-05	0.000312226
b0651	rihA	pyrimidine-specific ribonucleoside hydrolase RihA	CDS	-2.39369	6.09352e-05	0.00037506
b3935	priA	primosomal protein N'	CDS	-2.38174	1.90121e-05	0.000184405
b3065	rpsU	30S ribosomal subunit protein S21	CDS	-2.37867	0.0566261	0.0819949
b1286	rnb	RNase II	CDS	-2.37694	2.90349e-05	0.000238887
b1062	pyrC	dihydroorotase	CDS	-2.36523	0.000399889	0.00140452
b3084	rlmG	23S rRNA m(2)G1835 methyltransferase	CDS	-2.3636	1.61673e-05	0.000167879
b3822	recQ	ATP-dependent DNA helicase RecQ	CDS	-2.35379	2.16161e-05	0.000199559
b2231	gyrA	DNA gyrase subunit A	CDS	-2.33592	0.000358593	0.00130055
b2152	yeiB	DUF418 domain-containing protein YeiB	CDS	-2.33325	0.000242849	0.000987489
b3741	mnmG	5-carboxymethylaminomethyluridine-tRNA synthase subunit MnmG	CDS	-2.32499	0.000138723	0.000663462
b0440	hupB	DNA-binding protein HU-beta	CDS	-2.32465	3.8776e-05	0.000288915
b0884	infA	translation initiation factor IF-1	CDS	-2.32425	0.000489557	0.00164455
b3359	argD	N-acetylornithine aminotransferase/N-succinyldiaminopimelate aminotransferase	CDS	-2.32312	9.14005e-06	0.000120174
b3775	ppiC	peptidyl-prolyl cis-trans isomerase C	CDS	-2.30984	1.05248e-05	0.000132246
b2935	tktA	transketolase 1	CDS	-2.30982	7.35478e-05	0.000422676
b4204	yjfZ	DUF2686 domain-containing protein YjfZ	CDS	-2.26261	0.000132229	0.000639297
b1714	pheS	phenylalanine--tRNA ligase subunit alpha	CDS	-2.25694	9.05656e-05	0.000488112
b0211	mltD	membrane-bound lytic murein transglycosylase D	CDS	-2.2375	0.000207934	0.000876127
b4064	ghxP	guanine/hypoxanthine transporter GhxP	CDS	-2.23216	1.58862e-05	0.000167001
b1269	rluB	23S rRNA pseudouridine(2605) synthase	CDS	-2.22978	6.69708e-05	0.000399055
b3670	ilvN	acetohydroxy acid synthase I subunit IlvN	CDS	-2.22526	3.76993e-05	0.000284891
b4147	efp	protein chain elongation factor EF-P	CDS	-2.22066	5.63924e-05	0.000358965
b0197	metQ	L-methionine/D-methionine ABC transporter membrane anchored binding protein	CDS	-2.22064	7.01813e-05	0.000409986
b3703	rpmH	50S ribosomal subunit protein L34	CDS	-2.2164	6.01859e-05	0.000373152
b1632	rsxE	SoxR [2Fe-2S] reducing system protein RsxE	CDS	-2.21064	5.13253e-05	0.000341125
b3307	rpsN	30S ribosomal subunit protein S14	CDS	-2.20614	0.000411686	0.00143432
b3305	rplF	50S ribosomal subunit protein L6	CDS	-2.20568	0.000249102	0.00100564
b4375	prfC	peptide chain release factor RF3	CDS	-2.20124	4.33808e-05	0.000309644
b0841	ybjG	undecaprenyl pyrophosphate phosphatase	CDS	-2.19668	2.91356e-05	0.000238887
b0961	yccF	PF03733 family inner membrane protein YccF	CDS	-2.18754	3.82615e-05	0.000287605
b4317	fimD	type I fimbriae usher protein	CDS	-2.18142	1.66827e-05	0.000171801
b2595	bamD	outer membrane protein assembly factor BamD	CDS	-2.17865	6.72515e-05	0.000399168
b2277	nuoM	NADH:quinone oxidoreductase subunit M	CDS	-2.17619	0.000104779	0.000542387
b3088	alx	putative membrane-bound redox modulator Alx	CDS	-2.16664	0.000212427	0.0008906
b2114	metG	methionine--tRNA ligase	CDS	-2.16181	0.000272362	0.00107402
b3250	mreC	cell shape determining protein MreC	CDS	-2.16136	8.45407e-05	0.000462091
b1101	ptsG	glucose-specific PTS enzyme IIBC component	CDS	-2.15947	7.92323e-05	0.000445595
b1122	ymfA	putative inner membrane protein YmfA	CDS	-2.15545	0.000806959	0.00240956
b4372	holD	DNA polymerase III subunit psi	CDS	-2.14939	2.56757e-05	0.000222996
b3297	rpsK	30S ribosomal subunit protein S11	CDS	-2.14789	0.000177546	0.000781846
b4019	metH	cobalamin-dependent methionine synthase	CDS	-2.14764	0.000122881	0.000608955
b0835	rimO	ribosomal protein S12 methylthiotransferase RimO	CDS	-2.14719	0.000230969	0.000951433
b0636	rlmH	23S rRNA m(3)psi1915 methyltransferase	CDS	-2.13983	7.65648e-05	0.000433416
b0637	rsfS	ribosomal silencing factor RsfS	CDS	-2.13808	4.9853e-05	0.000335009
b1133	mnmA	tRNA-specific 2-thiouridylase	CDS	-2.13783	0.000119626	0.000597769
b1124	potC	spermidine preferential ABC transporter membrane subunit PotC	CDS	-2.13591	4.00486e-05	0.000295289
b3457	livH	branched chain amino acid/phenylalanine ABC transporter membrane subunit LivH	CDS	-2.13192	4.63262e-05	0.000322537
b1089	rpmF	50S ribosomal subunit protein L32	CDS	-2.12652	9.84879e-05	0.000520894
b2805	fucR	DNA-binding transcriptional activator FucR	CDS	-2.11594	4.28563e-05	0.000307451
b0573	cusF	copper/silver export system periplasmic binding protein	CDS	-2.10649	0.1094	0.146707
b0874	lysO	L-lysine/thialysine exporter	CDS	-2.10346	0.000126994	0.000621366
b1602	pntB	pyridine nucleotide transhydrogenase subunit beta	CDS	-2.10334	0.000131999	0.000639225
b2940	yqgC	protein YqgC	CDS	-2.10144	0.037652	0.0574788
b1817	manX	mannose-specific PTS enzyme IIAB component	CDS	-2.07771	5.37717e-05	0.000351877
b3788	rffG	dTDP-glucose 4,6-dehydratase 2	CDS	-2.07403	8.63791e-05	0.000470927
b1630	rsxD	SoxR [2Fe-2S] reducing system protein RsxD	CDS	-2.07035	0.00012613	0.000618561
b2278	nuoL	NADH:quinone oxidoreductase subunit L	CDS	-2.05968	0.000176908	0.000780625
b1123	potD	spermidine preferential ABC transporter periplasmic binding protein	CDS	-2.05929	7.03097e-05	0.000410051
b4032	malG	maltose ABC transporter membrane subunit MalG	CDS	-2.05772	3.68505e-05	0.000280977
b1603	pntA	pyridine nucleotide transhydrogenase subunit alpha	CDS	-2.05456	7.99372e-05	0.00044626
b3787	wecC	UDP-N-acetyl-D-mannosamine dehydrogenase	CDS	-2.05121	8.65574e-05	0.000471294
b2818	argA	N-acetylglutamate synthase	CDS	-2.04772	3.05042e-05	0.000245828
b3418	malT	DNA-binding transcriptional activator MalT	CDS	-2.04725	0.000207944	0.000876127
b0911	rpsA	30S ribosomal subunit protein S1	CDS	-2.04652	0.000288295	0.00111522
b3300	secY	Sec translocon subunit SecY	CDS	-2.04203	0.000501981	0.00167931
b1132	hflD	lysogenization regulator	CDS	-2.02919	5.13086e-05	0.000341125
b3553	ghrB	glyoxylate reductase	CDS	-2.00458	7.50124e-05	0.000428772
b2148	mglC	D-galactose/methyl-galactoside ABC transporter membrane subunit	CDS	-2.00009	4.75459e-05	0.000326437
b3232	zapE	cell division protein ZapE	CDS	-1.99991	2.26205e-05	0.000204799
b4049	dusA	tRNA-dihydrouridine synthase A	CDS	-1.99384	2.62736e-05	0.000224515
b1203	ychF	redox-responsive ATPase YchF	CDS	-1.99044	3.09848e-05	0.00024782
b4033	malF	maltose ABC transporter membrane subunit MalF	CDS	-1.98874	4.62146e-05	0.000322288
b0416	nusB	transcription antitermination protein NusB	CDS	-1.9797	5.75054e-05	0.000363431
b3821	pldA	outer membrane phospholipase A	CDS	-1.97467	2.81317e-05	0.000234726
b0430	cyoC	cytochrome bo3 subunit 3	CDS	-1.97304	0.00287503	0.00656465
b0407	yajC	Sec translocon accessory complex subunit YajC	CDS	-1.96242	5.12965e-05	0.000341125
b0477	gsk	inosine/guanosine kinase	CDS	-1.9572	0.000322224	0.00120465
b0576	pheP	phenylalanine:H(+) symporter PheP	CDS	-1.95595	0.000271716	0.00107402
b0003	thrB	homoserine kinase	CDS	-1.94631	0.000298053	0.00114145
b2697	alaS	alanine--tRNA ligase/DNA-binding transcriptional repressor	CDS	-1.93177	0.000339201	0.00125268
b1088	yceD	DUF177 domain-containing protein YceD	CDS	-1.92869	0.000392342	0.00138625
b3955	eptC	phosphoethanolamine transferase EptC	CDS	-1.92247	4.23199e-05	0.000305149
b4483	tatD	3' -> 5' ssDNA/RNA exonuclease TatD	CDS	-1.91369	0.000199043	0.00084788
b2276	nuoN	NADH:quinone oxidoreductase subunit N	CDS	-1.87724	0.000137069	0.000657035
b3772	ilvA	threonine deaminase	CDS	-1.87109	0.000103816	0.000541027
b3552	yiaD	PF13488 family lipoprotein YiaD	CDS	-1.86898	0.000380121	0.0013589
b3396	mrcA	peptidoglycan glycosyltransferase/peptidoglycan DD-transpeptidase MrcA	CDS	-1.86575	0.000177711	0.000781846
b0272	xynR	DNA-binding transcriptional repressor XynR	CDS	-1.86336	5.37302e-05	0.000351877
b0930	asnS	asparagine--tRNA ligase	CDS	-1.86283	0.000185675	0.000807952
b2686	emrB	multidrug efflux pump membrane subunit EmrB	CDS	-1.85813	0.0827175	0.114393
b3871	bipA	50S ribosomal subunit assembly factor BipA	CDS	-1.85706	0.000330692	0.00123089
b2951	yggS	PLP homeostasis protein	CDS	-1.85263	0.00386453	0.00834824
b0170	tsf	protein chain elongation factor EF-Ts	CDS	-1.84535	0.000721498	0.00221335
b4537	yecJ	DUF2766 domain-containing protein YecJ	CDS	-1.84394	0.000362326	0.00131185
b3298	rpsM	30S ribosomal subunit protein S13	CDS	-1.84129	0.000358121	0.00130055
b1479	maeA	malate dehydrogenase (oxaloacetate-decarboxylating)	CDS	-1.83995	0.000123858	0.000612369
b2027	wzzB	O-antigen co-polymerase	CDS	-1.83902	0.000656194	0.00207153
b3263	yhdU	DUF2556 domain-containing protein YhdU	CDS	-1.83753	0.000830627	0.00245831
b3340	fusA	elongation factor G	CDS	-1.8346	0.001179	0.00324934
b0589	fepG	ferric enterobactin ABC transporter membrane subunit FepG	CDS	-1.82693	5.99355e-05	0.000372688
b4328	iadA	isoaspartyl dipeptidase	CDS	-1.82515	7.42659e-05	0.000425651
b4348	hsdS	type I restriction enzyme EcoKI specificity subunit	CDS	-1.82135	0.000122628	0.000608955
b0578	nfsB	NAD(P)H-dependent nitroreductase NfsB	CDS	-1.81897	6.35065e-05	0.000386227
b0429	cyoD	cytochrome bo3 subunit 4	CDS	-1.81858	0.00221959	0.00534951
b3966	btuB	cobalamin outer membrane transporter	CDS	-1.81532	4.72326e-05	0.000326437
b1275	cysB	DNA-binding transcriptional dual regulator CysB	CDS	-1.80813	0.000390473	0.00138426
b2022	hisB	imidazoleglycerol-phosphate dehydratase/histidinol-phosphatase	CDS	-1.80588	0.00130211	0.00350003
b0169	rpsB	30S ribosomal subunit protein S2	CDS	-1.80525	0.000470437	0.00158819
b0067	thiP	thiamine ABC transporter membrane subunit	CDS	-1.80053	4.09086e-05	0.00029852
b2796	sdaC	L-serine:H(+) symporter SdaC	CDS	-1.7937	0.000349216	0.00127745
b2196	ccmF	holocytochrome c synthase CcmF component	CDS	-1.77519	0.000190464	0.00082289
b1161	ycgX	DUF1398 domain-containing protein YcgX	CDS	-1.77262	0.00053847	0.00178106
b3299	rpmJ	50S ribosomal subunit protein L36	CDS	-1.77257	0.000268941	0.00106874
b4053	alr	alanine racemase 1	CDS	-1.77123	5.12404e-05	0.000341125
b3638	yicR	RadC-like JAB domain-containing protein YicR	CDS	-1.76378	0.000233344	0.000960283
b0635	mrdA	peptidoglycan DD-transpeptidase MrdA	CDS	-1.76155	0.000361907	0.00131145
b2476	purC	phosphoribosylaminoimidazole-succinocarboxamide synthase	CDS	-1.7505	0.000168531	0.000758206
b3339	tufA	translation elongation factor Tu 1	CDS	-1.74988	0.000776299	0.0023449
b0143	pcnB	poly(A) polymerase I	CDS	-1.74422	0.000322755	0.00120558
b0888	trxB	thioredoxin reductase	CDS	-1.74316	0.00141152	0.00372806
b1216	chaA	Na(+)/K(+):H(+) antiporter ChaA	CDS	-1.74192	0.000324684	0.00121065
b2683	ygaH	L-valine exporter, YgaH component	CDS	-1.72231	0.0187566	0.0313373
b1207	prs	ribose-phosphate diphosphokinase	CDS	-1.71364	0.000140173	0.000665899
b1198	dhaM	dihydroxyacetone kinase subunit M	CDS	-1.71328	7.99632e-05	0.00044626
b1819	manZ	mannose-specific PTS enzyme IID component	CDS	-1.71228	0.000141764	0.000669631
b0805	fiu	iron catecholate outer membrane transporter Fiu	CDS	-1.70785	0.00127827	0.00344811
b3251	mreB	dynamic cytoskeletal protein MreB	CDS	-1.70617	0.000234811	0.00096352
b3228	sspB	ClpXP protease specificity-enhancing factor	CDS	-1.69915	9.46553e-05	0.000504393
b1818	manY	mannose-specific PTS enzyme IIC component	CDS	-1.68706	0.000214104	0.000894979
b4349	hsdM	type I restriction enzyme EcoKI methylase subunit	CDS	-1.68216	8.0098e-05	0.000446425
b3170	rimP	ribosome maturation factor RimP	CDS	-1.67917	0.000272171	0.00107402
b0415	ribE	6,7-dimethyl-8-ribityllumazine synthase	CDS	-1.66542	0.000182618	0.00079628
b2150	mglB	D-galactose/methyl-galactoside ABC transporter periplasmic binding protein	CDS	-1.66437	7.6198e-05	0.000433216
b0073	leuB	3-isopropylmalate dehydrogenase	CDS	-1.66359	0.002306	0.00550819
b2032	wbbK	putative glycosyltransferase WbbK	CDS	-1.66211	0.000315891	0.0011883
b0948	rlmL	fused 23S rRNA m(2)G2445 methyltransferase and 23S rRNA m(7)G2069 methyltransferase	CDS	-1.66139	0.000215978	0.000901042
b3835	ubiB	ubiquinone biosynthesis protein UbiB	CDS	-1.66118	0.000107758	0.000549399
b2576	srmB	ATP-dependent RNA helicase SrmB	CDS	-1.65868	5.52192e-05	0.000357331
b1804	rnd	RNase D	CDS	-1.65668	0.000214818	0.000897084
b3229	sspA	stringent starvation protein A	CDS	-1.65499	0.000139361	0.000665765
b3358	yhfK	putative transporter YhfK	CDS	-1.65469	9.38619e-05	0.000501423
b3920	yiiQ	DUF1454 domain-containing protein YiiQ	CDS	-1.65115	0.000335552	0.00124353
b0423	thiI	tRNA uridine 4-sulfurtransferase	CDS	-1.64442	8.04055e-05	0.000447552
b2286	nuoC	NADH:quinone oxidoreductase subunit CD	CDS	-1.64196	0.000443817	0.00152132
b3633	waaA	KDO transferase	CDS	-1.64009	0.000444723	0.00152317
b2284	nuoF	NADH:quinone oxidoreductase subunit F	CDS	-1.63843	0.000809166	0.00241329
b1779	gapA	glyceraldehyde-3-phosphate dehydrogenase A	CDS	-1.63807	0.00145231	0.00380739
b0588	fepC	ferric enterobactin ABC transporter ATP binding subunit	CDS	-1.63627	0.000379235	0.00135763
b2069	yegD	HSP70 family protein YegD	CDS	-1.63402	0.000181997	0.00079512
b0142	folK	2-amino-4-hydroxy-6- hydroxymethyldihydropteridine diphosphokinase	CDS	-1.62843	0.000774342	0.00234066
b0632	dacA	D-alanyl-D-alanine carboxypeptidase DacA	CDS	-1.62337	0.000766835	0.00232625
b0174	ispU	ditrans,polycis-undecaprenyl-diphosphate synthase [(2E,6E)-farnesyl-diphosphate specific]	CDS	-1.61742	0.000287583	0.00111438
b0121	speE	spermidine synthase	CDS	-1.61644	0.000151878	0.000704165
b2682	ygaZ	L-valine exporter, YgaZ component	CDS	-1.61643	0.000397959	0.00140028
b2350	yfdG	putative bactoprenol-linked glucose translocase	CDS	-1.61075	0.00147988	0.0038701
b2280	nuoJ	NADH:quinone oxidoreductase subunit J	CDS	-1.61062	0.000229284	0.000947247
b0859	rlmC	23S rRNA m(5)U747 methyltransferase	CDS	-1.60965	0.000540934	0.00178643
b2281	nuoI	NADH:quinone oxidoreductase subunit I	CDS	-1.59971	0.000406511	0.00142168
b3544	dppA	dipeptide ABC transporter periplasmic binding protein	CDS	-1.59617	0.00299342	0.00677306
b3002	yqhA	UPF0114 family protein YqhA	CDS	-1.59445	0.00128723	0.00346662
b0853	ybjN	protein YbjN	CDS	-1.58983	0.000282806	0.00109888
b2330	prmB	ribosomal protein L3 N(5)-glutamine methyltransferase	CDS	-1.58095	0.00035255	0.00128632
b0157	yadS	PF03458 family protein YadS	CDS	-1.58094	0.000371025	0.00133764
b3407	yhgF	putative RNA-binding protein YhgF	CDS	-1.57944	0.000258699	0.00103553
b2149	mglA	D-galactose/methyl-galactoside ABC transporter ATP binding subunit	CDS	-1.5785	0.000591508	0.00191912
b4246	pyrL	pyrBI operon leader peptide	CDS	-1.57559	0.000572977	0.00187765
b3742	mioC	flavoprotein MioC	CDS	-1.57286	0.000766749	0.00232625
b2282	nuoH	NADH:quinone oxidoreductase subunit H	CDS	-1.56709	0.00068329	0.00213064
b3936	rpmE	50S ribosomal subunit protein L31	CDS	-1.56701	0.00886566	0.0167792
b1816	yoaE	TerC family inner membrane protein YoaE	CDS	-1.56637	0.00060899	0.00196533
b0158	btuF	vitamin B12 ABC transporter periplasmic binding protein	CDS	-1.56274	0.000141904	0.000669631
b3164	pnp	polynucleotide phosphorylase	CDS	-1.56019	0.00104474	0.00295408
b2395	pdeA	putative c-di-GMP phosphodiesterase PdeA	CDS	-1.55929	0.00144473	0.00378986
b0072	leuC	3-isopropylmalate dehydratase subunit LeuC	CDS	-1.55564	0.00346525	0.00765309
b2965	speC	constitutive ornithine decarboxylase	CDS	-1.55495	0.00913274	0.017208
b0914	msbA	ATP-binding lipopolysaccharide transport protein	CDS	-1.5529	0.00058863	0.00191367
b3714	adeP	adenine:H(+) symporter	CDS	-1.55127	0.000396355	0.0013979
b2285	nuoE	NADH:quinone oxidoreductase subunit E	CDS	-1.55126	0.000633622	0.00202651
b3256	accC	biotin carboxylase	CDS	-1.54093	0.000276933	0.00108503
b3255	accB	biotin carboxyl carrier protein	CDS	-1.54002	0.000212979	0.000892021
b3839	tatC	twin arginine protein translocation system - TatC protein	CDS	-1.53525	9.27816e-05	0.000496902
b1628	rsxB	SoxR [2Fe-2S] reducing system protein RsxB	CDS	-1.5274	0.00819749	0.0157177
b1652	rnt	ribonuclease T	CDS	-1.52613	0.000148604	0.000692779
b4136	dsbD	thiol-disulfide exchange protein DsbD	CDS	-1.52486	0.000190133	0.00082289
b3236	mdh	malate dehydrogenase	CDS	-1.51007	0.000277684	0.00108608
b2325	yfcL	PF08891 family protein YfcL	CDS	-1.50298	0.000117754	0.00058978
b3172	argG	argininosuccinate synthetase	CDS	-1.50238	0.00019028	0.00082289
b2283	nuoG	NADH:quinone oxidoreductase subunit G	CDS	-1.50142	0.000953163	0.00274075
b3812	yigB	5-amino-6-(5-phospho-D-ribitylamino)uracil phosphatase	CDS	-1.49836	0.000109198	0.000554203
b2522	sseB	protein SseB	CDS	-1.4966	0.000399756	0.00140452
b4388	serB	phosphoserine phosphatase	CDS	-1.49611	0.000456611	0.00155262
b2288	nuoA	NADH:quinone oxidoreductase subunit A	CDS	-1.49474	0.00031777	0.0011922
b2370	evgS	sensor histidine kinase EvgS	CDS	-1.49396	0.000376995	0.00135228
b2171	yeiP	elongation factor P-like protein YeiP	CDS	-1.4938	0.0248709	0.0401948
b0112	aroP	aromatic amino acid:H(+) symporter AroP	CDS	-1.49258	0.000468708	0.00158487
b2033	wbbJ	putative lipopolysaccharide biosynthesis O-acetyl transferase WbbJ	CDS	-1.49158	0.00023794	0.000973293
b4359	opgB	phosphoglycerol transferase I	CDS	-1.48695	0.00178609	0.00449114
b1418	cybB	superoxide oxidase	CDS	-1.48478	0.000168573	0.000758206
b2326	epmC	EF-P-Lys34 hydroxylase	CDS	-1.48308	0.000213186	0.000892021
b0183	rnhB	RNase HII	CDS	-1.47307	0.000176352	0.000779796
b2186	yejK	nucleoid-associated protein YejK	CDS	-1.46367	0.00016761	0.000756472
b3180	yhbY	ribosome assembly factor YhbY	CDS	-1.45629	0.000675822	0.00211201
b2279	nuoK	NADH:quinone oxidoreductase subunit K	CDS	-1.45488	0.00065268	0.00206706
b2524	iscX	accessory iron-sulfur cluster assembly protein IscX	CDS	-1.45295	0.000358494	0.00130055
b1086	rluC	23S rRNA pseudouridine(955/2504/2580) synthase	CDS	-1.45157	0.000703097	0.00217222
b2287	nuoB	NADH:quinone oxidoreductase subunit B	CDS	-1.44565	0.000291768	0.00112445
b2605	yfiB	lipoprotein YfiB	CDS	-1.44363	0.000432787	0.00149071
b3189	murA	UDP-N-acetylglucosamine 1-carboxyvinyltransferase	CDS	-1.44299	0.000634322	0.00202706
b3392	hofP	DNA utilization protein HofP	CDS	-1.44144	0.0544077	0.0792419
b2025	hisF	imidazole glycerol phosphate synthase subunit HisF	CDS	-1.43993	0.00157343	0.00406812
b0610	rnk	nucleoside diphosphate kinase regulator	CDS	-1.43975	0.000302121	0.0011518
b0833	pdeI	putative c-di-GMP phosphodiesterase PdeI	CDS	-1.43938	0.00306309	0.0069013
b2467	nudK	GDP-mannose hydrolase	CDS	-1.43515	0.000313569	0.00118447
b1136	icd	isocitrate dehydrogenase	CDS	-1.41185	0.00184498	0.00461162
b2700	pncC	NMN aminohydrolase	CDS	-1.40759	0.000180251	0.000789202
b2034	wbbI	beta-1,6-galactofuranosyltransferase WbbI	CDS	-1.39946	0.000921655	0.00267003
b0408	secD	Sec translocon accessory complex subunit SecD	CDS	-1.39797	0.000581937	0.00189531
b2953	yggU	DUF167 domain-containing protein YggU	CDS	-1.39773	0.000530402	0.00175763
b3614	yibQ	divergent polysaccharide deacetylase domain-containing protein YibQ	CDS	-1.39527	0.000375606	0.00134958
b0066	thiQ	thiamine ABC transporter ATP binding subunit	CDS	-1.3928	0.000406721	0.00142168
b1851	edd	phosphogluconate dehydratase	CDS	-1.38478	0.000166872	0.000753944
b1435	rlhA	23S rRNA 5-hydroxycytidine C2501 synthase	CDS	-1.3846	0.000276943	0.00108503
b2026	hisI	putative bifunctional phosphoribosyl-AMP cyclohydrolase/phosphoribosyl-ATP pyrophosphatase	CDS	-1.382	0.00131895	0.00353635
b2351	yfdH	bactoprenol glucosyl transferase	CDS	-1.38041	0.0137138	0.0241872
b3667	uhpC	inner membrane protein sensing glucose-6-phosphate	CDS	-1.37817	0.00194202	0.00480078
b3790	rffC	RffC	CDS	-1.37434	0.000556266	0.00183279
b3786	wecB	UDP-N-acetylglucosamine 2-epimerase	CDS	-1.37098	0.000546381	0.00180301
b0469	apt	adenine phosphoribosyltransferase	CDS	-1.36682	0.00443419	0.00935054
b3784	rfe	UDP-N-acetylglucosamine--undecaprenyl-phosphate N-acetylglucosaminephosphotransferase	CDS	-1.36569	0.00166941	0.00426594
b1627	rsxA	SoxR [2Fe-2S] reducing system protein RsxA	CDS	-1.35882	0.00298112	0.00675243
b0661	miaB	isopentenyl-adenosine A37 tRNA methylthiolase	CDS	-1.35301	0.000429474	0.0014817
b3347	fkpA	peptidyl-prolyl cis-trans isomerase FkpA	CDS	-1.34356	0.000684216	0.00213166
b3622	waaL	O-antigen ligase	CDS	-1.3387	0.000623632	0.00200345
b0115	aceF	pyruvate dehydrogenase, E2 subunit	CDS	-1.33094	0.0105145	0.0193479
b0052	pdxA	4-hydroxythreonine-4-phosphate dehydrogenase	CDS	-1.32802	0.000430993	0.00148573
b3778	rep	ATP-dependent DNA helicase Rep	CDS	-1.32736	0.000343887	0.00126231
b3939	metB	O-succinylhomoserine(thiol)-lyase/O- succinylhomoserine lyase	CDS	-1.32653	0.000780083	0.00235193
b0420	dxs	1-deoxy-D-xylulose-5-phosphate synthase	CDS	-1.32312	0.00105888	0.00298213
b0171	pyrH	UMP kinase	CDS	-1.3208	0.000788628	0.00237035
b3810	yigA	DUF484 domain-containing protein YigA	CDS	-1.31748	0.000304183	0.00115655
b3342	rpsL	30S ribosomal subunit protein S12	CDS	-1.31397	0.0019888	0.00489317
b2435	amiA	N-acetylmuramoyl-L-alanine amidase A	CDS	-1.31237	0.0142807	0.0250413
b0008	talB	transaldolase B	CDS	-1.30981	0.00134163	0.00357342
b0820	ybiT	putative ATP-binding protein YbiT	CDS	-1.29966	0.00164069	0.00420265
b3168	infB	translation initiation factor IF-2beta'	CDS	-1.29683	0.00211852	0.0051443
b3860	dsbA	thiol:disulfide oxidoreductase DsbA	CDS	-1.29393	0.000408333	0.00142614
b0428	cyoE	heme O synthase	CDS	-1.29033	0.00608008	0.0121975
b4207	fklB	peptidyl-prolyl cis-trans isomerase FklB	CDS	-1.28317	0.00192554	0.0047656
b2176	pdeN	putative c-di-GMP phosphodiesterase PdeN	CDS	-1.28284	0.00184595	0.00461162
b2400	gltX	glutamate--tRNA ligase	CDS	-1.28256	0.00091855	0.00266285
b0116	lpd	lipoamide dehydrogenase	CDS	-1.27643	0.00324183	0.00723111
b3640	dut	dUTP diphosphatase	CDS	-1.27402	0.000249731	0.00100723
b2954	rdgB	dITP/XTP pyrophosphatase	CDS	-1.26635	0.00030864	0.0011714
b0194	proS	proline--tRNA ligase	CDS	-1.26165	0.00115591	0.00320022
b1090	plsX	putative phosphate acyltransferase	CDS	-1.25778	0.00104683	0.00295605
b0889	lrp	DNA-binding transcriptional dual regulator Lrp	CDS	-1.25359	0.000669449	0.00209981
b2971	yghG	lipoprotein YghG	CDS	-1.2502	0.102541	0.138824
b3257	yhdT	DUF997 domain-containing protein YhdT	CDS	-1.24995	0.00180144	0.0045217
b4068	yjcH	DUF485 domain-containing inner membrane protein YjcH	CDS	-1.24362	0.000943215	0.00271951
b1716	rplT	50S ribosomal subunit protein L20	CDS	-1.2424	0.00402419	0.00862733
b2890	lysS	lysine--tRNA ligase	CDS	-1.2389	0.00204315	0.00499554
b0574	cusB	copper/silver export system membrane fusion protein	CDS	-1.23343	0.198966	0.24744
b3363	ppiA	peptidyl-prolyl cis-trans isomerase A	CDS	-1.23153	0.00123882	0.00337761
b0166	dapD	tetrahydrodipicolinate succinylase	CDS	-1.22667	0.00183006	0.00457731
b3166	truB	tRNA pseudouridine(55) synthase	CDS	-1.22634	0.000679862	0.00212307
b0393	rdgC	nucleoid-associated protein RdgC	CDS	-1.21414	0.00261311	0.00610237
b2321	flk	putative flagella assembly protein	CDS	-1.21333	0.00169893	0.00432316
b3811	xerC	site-specific tyrosine recombinase	CDS	-1.20955	0.000391876	0.00138625
b0758	galT	galactose-1-phosphate uridylyltransferase	CDS	-1.20907	0.000904707	0.00262862
b0098	secA	protein translocation ATPase	CDS	-1.20049	0.00117862	0.00324934
b3892	fdoI	formate dehydrogenase O subunit gamma	CDS	-1.19411	0.000525959	0.00174648
b4013	metA	homoserine O-succinyltransferase	CDS	-1.19021	0.00330014	0.00734191
b3341	rpsG	30S ribosomal subunit protein S7	CDS	-1.18037	0.00317367	0.00709772
b4069	acs	acetyl-CoA synthetase (AMP-forming)	CDS	-1.17963	0.00204248	0.00499554
b2685	emrA	multidrug efflux pump membrane fusion protein EmrA	CDS	-1.17428	0.00431018	0.00913439
b1717	rpmI	50S ribosomal subunit protein L35	CDS	-1.1724	0.00375789	0.00815106
b1284	yciT	DNA-binding transcriptional dual regulator YciT	CDS	-1.16561	0.00963587	0.0180042
b1055	trhO	tRNA U34 hydroxylase TrhO	CDS	-1.16556	0.00103855	0.00293852
b0421	ispA	geranyl diphosphate/farnesyl diphosphate synthase	CDS	-1.15372	0.00171998	0.00436571
b4316	fimC	type 1 fimbriae periplasmic chaperone	CDS	-1.15363	0.000674498	0.00210942
b3669	uhpA	DNA-binding transcriptional activator UhpA	CDS	-1.15207	0.00125	0.00339967
b2035	wbbH	putative O-antigen polymerase	CDS	-1.14579	0.00209403	0.00510231
b3194	mlaE	intermembrane phospholipid transport system, integral membrane subunit MlaE	CDS	-1.14513	0.00059847	0.00193875
b0529	folD	bifunctional methylenetetrahydrofolate dehydrogenase/methenyltetrahydrofolate cyclohydrolase	CDS	-1.14144	0.000873346	0.00255448
b0118	acnB	AcnB	CDS	-1.13808	0.0135342	0.0239398
b3668	uhpB	sensory histidine kinase UhpB	CDS	-1.1378	0.000499965	0.00167457
b3398	igaA	inner membrane protein IgaA	CDS	-1.13539	0.0256773	0.0413074
b2553	glnB	nitrogen regulatory protein PII-1	CDS	-1.13103	0.000947177	0.00272723
b3700	recF	recombination mediator protein RecF	CDS	-1.13039	0.000707529	0.00218023
b1116	lolC	lipoprotein release complex - inner membrane subunit	CDS	-1.13004	0.000977322	0.00279884
b3940	metL	fused aspartate kinase/homoserine dehydrogenase 2	CDS	-1.11231	0.00269332	0.00623692
b1243	oppA	oligopeptide ABC transporter periplasmic binding protein	CDS	-1.10356	0.00949192	0.0177665
b2320	pdxB	erythronate-4-phosphate dehydrogenase	CDS	-1.10099	0.00222693	0.00535547
b1232	purU	formyltetrahydrofolate deformylase	CDS	-1.0972	0.00231106	0.00551677
b2178	yejB	putative oligopeptide ABC transporter membrane subunit YejB	CDS	-1.09708	0.00393915	0.00847496
b0184	dnaE	DNA polymerase III subunit alpha	CDS	-1.09678	0.0012559	0.00341254
b0630	lipB	lipoyl(octanoyl) transferase	CDS	-1.0964	0.00370058	0.0080638
b3934	cytR	DNA-binding transcriptional repressor CytR	CDS	-1.09591	0.00970815	0.0181153
b1636	pdxY	pyridoxal kinase 2	CDS	-1.0896	0.00122483	0.00335172
b2820	recB	exodeoxyribonuclease V subunit RecB	CDS	-1.08658	0.00290467	0.006611
b2436	hemF	coproporphyrinogen III oxidase	CDS	-1.08548	0.395525	0.453263
b2236	yfaE	ferredoxin-like diferric-tyrosyl radical cofactor maintenance protein YfaE	CDS	-1.07803	0.00303547	0.00684997
b2747	ispD	2-C-methyl-D-erythritol 4-phosphate cytidylyltransferase	CDS	-1.07618	0.00172952	0.00437678
b4346	mcrB	5-methylcytosine-specific restriction enzyme subunit McrB	CDS	-1.0752	0.00425425	0.00903578
b0526	cysS	cysteine--tRNA ligase	CDS	-1.07458	0.00412532	0.00880846
b4389	radA	DNA recombination protein	CDS	-1.07041	0.0029864	0.0067608
b0198	metI	L-methionine/D-methionine ABC transporter membrane subunit	CDS	-1.06911	0.000764515	0.00232253
b1139	lit	cell death peptidase Lit	CDS	-1.06547	0.00220666	0.00532785
b0472	recR	recombination mediator protein RecR	CDS	-1.06243	0.0035473	0.00779378
b4067	actP	acetate/glycolate:cation symporter	CDS	-1.04652	0.00210802	0.00512758
b3974	coaA	pantothenate kinase	CDS	-1.03991	0.0158185	0.0272984
b3393	hofO	DNA utilization protein HofO	CDS	-1.03557	0.0966941	0.131537
b3055	ygiM	putative signal transduction protein (SH3 domain)	CDS	-1.02647	0.0578902	0.0835689
b2914	rpiA	ribose-5-phosphate isomerase A	CDS	-1.01879	0.00296617	0.00672216
b1247	oppF	murein tripeptide ABC transporter/oligopeptide ABC transporter ATP binding subunit OppF	CDS	-1.01782	0.00916608	0.0172631
b3697	yidA	sugar phosphatase YidA	CDS	-1.01728	0.00129141	0.00347348
b2952	yggT	uncharacterized protein YggT	CDS	-1.01645	0.0964564	0.131256
b3846	fadB	multifunctional enoyl-CoA hydratase, 3-hydroxyacyl-CoA epimerase, Delta(3)-cis- Delta(2)-trans-enoyl-CoA isomerase, L-3-hydroxyacyl-CoA dehydrogenase	CDS	-1.01637	0.0822177	0.113813
b3456	livM	branched chain amino acid/phenylalanine ABC transporter membrane subunit LivM	CDS	-1.01161	0.00664224	0.0131085
b1612	fumA	fumarase A	CDS	-1.01104	0.00340314	0.00754338
b3642	pyrE	orotate phosphoribosyltransferase	CDS	-1.00863	0.00742519	0.0143994
b2316	accD	acetyl-CoA carboxyltransferase subunit beta	CDS	-1.00469	0.00225222	0.00541017
b3182	dacB	peptidoglycan DD-endopeptidase DacB	CDS	-1.00282	0.00107062	0.00301121
